1  
2  
3  
4  
5  
6  
7  
8  
9  
10  
11  
12  
13  
14  
15  
16  
17  
18  
19  
20  
21  
22  
23  
24  
25  
26  
27  
28  
29  
30  
31  
32  
33  
34  
35  
36  
37  
38  
39  
40  
41  
42  
43  
44  
45

## Mechanisms for Communicating in a Marmoset ‘Cocktail Party’

Vladimir Jovanovic & Cory T Miller

Cortical Systems and Behavior Laboratory  
Neurosciences Graduate Program  
University of California, San Diego

Direct all materials and correspondence to Cory Miller | [corymiller@ucsd.edu](mailto:corymiller@ucsd.edu)

46 **Abstract.**

47

48 A fundamental challenge for audition is parsing the voice of a single speaker amid a cacophony  
49 of other voices known as the Cocktail Party Problem (CPP). Despite its prevalence, relatively  
50 little remains known about how our simian cousins solve the CPP for active, natural  
51 communication. Here we employed an innovative, multi-speaker paradigm comprising five  
52 computer-generated Virtual Monkeys (VM) whose respective vocal behavior could be  
53 systematically varied to construct marmoset cocktail parties and tested the impact of specific  
54 acoustic scene manipulations on vocal behavior. Results indicate that marmosets not only employ  
55 auditory mechanisms – including attention – for speaker stream segregation, but also selectively  
56 change their own vocal behavior in response to the dynamics of the acoustic scene to overcome  
57 the challenges of the CPP. These findings suggest notable parallels between human and  
58 nonhuman primate audition and highlight the active role that speakers play to optimize  
59 communicative efficacy in complex real-world acoustic scenes.

60

61

## 62 Introduction.

63 Our ability to effectively communicate with others is often complicated by the co-occurrence of  
64 other speakers in an acoustic scene, classically illustrated by the Cocktail Party Problem [CPP] <sup>1</sup>,  
65 <sup>2, 3, 4</sup>. Studies suggest that humans are able to resolve the challenges of listening in multi-talker  
66 scenes using a handful of perceptual cues, including the spatial separation of the speakers and  
67 the acoustic idiosyncrasies of individual voices <sup>4, 5</sup>. Even relatively small distances between  
68 talkers can increase intelligibility significantly while differences in each speaker's voice pitch  
69 provides a reliable cue <sup>6, 7, 8</sup>. In more dynamic scenes involving numerous talkers, these cues may  
70 become less clear, requiring listeners to employ top-down perceptual mechanisms to selectively  
71 attend to a particular individual's voice <sup>9, 10</sup>. During speech, one could learn a talker's voice and  
72 segregate it into a single stream, potentially as a learned schema <sup>4, 8, 11, 12, 13, 14</sup>, facilitating its  
73 segregation from other sounds in the acoustic landscape. Although human and nonhuman  
74 primates share the core architecture of the cortical auditory system that distinguish our Order from  
75 other taxa <sup>15, 16, 17, 18</sup> and face similar challenges of communicating in noisy environments  
76 comprising multiple conspecifics vocalizing in concurrence <sup>19</sup>, there are a notable dearth of  
77 experiments testing whether nonhuman primates solve the CPP employing similar mechanisms  
78 as humans. In fact, only a handful of experiments have explored whether more general auditory  
79 scene analysis mechanisms are evident in our simian cousins <sup>20, 21, 22, 23</sup>. Certainly observations  
80 indicate that primates are able to communicate in noisy environments, but whether this is  
81 accomplished because nonhuman primates are talented acoustic scene analyzers that rely  
82 primarily on bottom-up auditory mechanism, as is the case in some other nonhuman animals <sup>3</sup>,  
83 or are able to employ more top-down attentional processes characteristic of humans <sup>9, 24, 25, 26</sup> is  
84 not yet known. Here we implemented an innovative, multi-speaker, interactive playback paradigm  
85 that simulates a natural cocktail party while providing experimental control to systematically  
86 manipulate multiple dimensions of the acoustic scene to test whether a species of nonhuman  
87 primate – common marmosets (*Callithrix jacchus*) – resolves the CPP by employing similar  
88 mechanisms as humans. Our goal was not to measure psychoacoustic thresholds of the  
89 perceptual processes that reflect auditory scene analysis mechanisms applied generally in  
90 audition <sup>8</sup>, but rather to test how these mechanisms - and potentially others - are leveraged under  
91 real-world conditions to overcome the CPP for active communication in a nonhuman primate.

92 Common marmosets are highly voluble New World monkey who naturally engage in long-  
93 distance conversational exchanges within noisy, dynamic communication networks that reflect  
94 the CPP <sup>27</sup>. Like human conversations, the temporal dynamics of these marmoset conversations  
95 are governed by learned social rules <sup>28, 29, 30</sup>. Moreover, marmoset phee calls are individually  
96 distinctive and recognizable in conversations <sup>28, 31, 32</sup>. Building on our previous interactive  
97 playback paradigm <sup>31, 33</sup>, we used a multi-speaker design to construct cocktail parties in which a  
98 single live monkey heard phee calls – the species-typical long-distance contact call <sup>29, 32</sup> –  
99 produced by five Virtual Monkeys (VMs) whose respective vocal behavior differed relative to the  
100 subjects. In this innovative design, the behavior of one VM – the Target – was designed to directly  
101 interact with the live marmoset, emitting vocalizations in response to the subject in order to  
102 engage them in conversational exchanges, while the timing of the other VMs – the Distractors –  
103 were independent of the subject. Phee calls from pairs of VM Distractors were constructed in  
104 temporal sequences that simulated natural conversational exchanges, such that concurrent  
105 conversations between VM Distractor pairs were broadcast in each cocktail party. This innovative  
106 paradigm afforded a powerful opportunity to systematically manipulate features of the acoustic  
107 scene (e.g. spatial separability and predictability of VM location, distractor density, and the  
108 acoustic structure of the vocalizations themselves) in order to explicitly test their effect on  
109 subjects' propensity to engage in conversational exchanges with the Target VM; thus providing  
110 key insights into the mechanisms that this primate employs to overcome the challenges of  
111 communicating in a cocktail party.

## 112 **Results.**

113

114 We tested adult common marmoset monkeys in a series of experiments designed to test how  
115 nonhuman primates solve the CPP for active communication. We observed no statistically  
116 significant difference in the number of vocalizations produced by subjects across all Test  
117 conditions (1-way ANOVA,  $n = 288$ ,  $F(15,272)=0.91$ ,  $p=0.557$ ) suggesting that that all constructed  
118 cocktail parties elicited comparable volubility and no overt suppression of vocal behavior in  
119 marmosets.

120

### 121 **Baseline Vocal Behaviors.**

122 Marmosets perceive calls produced within 10s of their own as a ‘response’ during antiphonal  
123 conversations<sup>28, 33</sup>. Given this generous response window, a critical issue for these experiments  
124 was ascertaining whether calls emitted by subjects following a VM call were deliberate responses  
125 or simply covaried with the timing of the VM call (i.e. false positive).

126 To establish false positive rates, we compared marmoset vocal behavior in three  
127 conditions – Fixed-Location, Target Baseline and All Baseline. See Methods for a more detailed  
128 description of these conditions. Briefly, the Fixed-Location condition involved broadcasting  
129 conversations between 2 pairs of Distractor VMs (4 total VMs) and a single, interactive Target VM  
130<sup>29, 31, 33</sup>. The ‘Target Baseline’ test condition was identical to the ‘Fixed-Location’ condition except  
131 that the Target VM calls were not audible. In other words, the timing of a stimulus was recorded  
132 but no stimulus was broadcast. This allowed us to ascertain the probability that marmosets’  
133 intrinsic call rate and timing would occur in the response window of the ‘silent’ Target VM calls  
134 (i.e. false positive rate) in an environment comprising multiple potential conspecific conversational  
135 partners. In the ‘All Baseline’ condition, no vocalization stimuli were broadcast. Similarly to the  
136 Target Baseline condition, however, the timing of when interactive Target VM calls would occur  
137 was recorded to establish the probability of false positive responses when no calls from other  
138 marmosets were broadcast.

139 We first compared marmoset vocal behavior across these conditions by analyzing  
140 subjects’ inter-call interval (ICI), including both conversational exchanges and spontaneous calls.  
141 The estimated PDF (see Methods) for the duration of these ICIs was notably different across the  
142 three conditions suggesting that the presence of multiple conspecific calls, and their respective  
143 behavior affected subjects’ vocal behavior (Figure 2a). More detailed analyses showed that  
144 subjects take significantly longer to produce half of all their calls per session (dashed Median data  
145 line) in the Fixed-Location condition than the other two conditions (Figure 2b). In fact, subjects’  
146 rate of calling in this condition was relatively constant, while subjects had a bias to produce a  
147 higher percentage of calls in the first half of the session for the two baseline conditions – All  
148 Baseline and Target Baseline. This was most prominent in the All-Baseline condition which had  
149 a significantly different cumulative distribution than the other conditions ( $n = 18$  for each, 95%  
150 Confidence Interval).

151 We next focused on ICI during conversations (i.e. exchanges comprising 2 or more  
152 reciprocal call exchanges between the Target VM and subject). Although ‘conversations’ were  
153 evident in all contexts (Figure 2c), analyses of the timing of these conversations revealed crucial  
154 differences across the test conditions (Figure 2d). Notably, the majority of ‘conversations’ in the  
155 All-Baseline condition occurred early each test session suggesting that in the absence of  
156 conspecific calls, marmosets were producing phee calls at a high rate during this period,  
157 consistent with overall ICI analyses (Figure 2b). Furthermore, while no difference was evident  
158 between the Target Baseline and Fixed-Location conditions for approximately the first six minutes  
159 of a test session, the occurrence of conversations significantly diverged at this point. Specifically,  
160 subjects’ vocal behavior becomes more selective in the Fixed-Location condition.

161 To further test whether marmosets exhibited a meaningful shift in behavioral strategies  
162 after the first six minutes of a test session, we analyzed marmoset vocal behavior in the Target  
163 Baseline and Fixed-Location conditions before (Figure 2e) and after (Figure 2f) six minutes of  
164 each test session (i.e. >360s). While there was no difference in the PDF of conversation length  
165 between these conditions in the first six minutes of each session distributions (Kruskall-Wallis,  
166  $X^2(1, n=558) < 1e-4$ ,  $p=0.994$ ; Figure 2E), marmoset conversational behavior significantly diverged  
167 after this point (Kruskall-Wallis,  $X^2(1, n=990)=17.5$ ,  $p < 0.0001$ ; Figure 2f). At this time point,  
168 subjects' vocal behavior in conversations are selectively coordinated with the Target VM. This  
169 suggests that the first six minutes of a test session are needed to learn the identity of the Target  
170 VM, at which point their vocal behavior changes from one of exploration in which they are  
171 assessing whether any VMs in the acoustic scene are explicitly interacting with them to a  
172 behavioral strategy that is selectively focused on interacting with the Target VM. Based on these  
173 analyses, all subsequent comparisons of subjects' vocal behavior were performed only after the  
174 first six minutes of each test session.

175

### 176 **Communication Index.**

177 We focused subsequent analyses on marmoset conversations because they reflect a  
178 coordinated, reciprocal communication exchange that abides social rules<sup>30, 34, 35</sup>. Given the high  
179 incident of false positive responses in baseline conditions, we developed a single behavioral  
180 metric to compare marmoset conversations across the test conditions – the Communication Index  
181 (Figure 3a; see also Methods for a more thorough explanation).

182 Figure 3b plots the results of applying this behavioral metric to marmoset vocal behavior  
183 in the Target Baseline and Fixed Location test conditions. There was a main effect on condition  
184 and VM as well as an interactive effect (2-Way ANOVA,  $n=27985$ , VM:  $F(4, 27975)=572$ ,  $p <$   
185  $0.0001$ ; Condition:  $F(1, 27975)=54.4$ ,  $p < 0.0001$ ; VM\*Condition  $F(4, 27975)=65.3$ ,  $p < 0.0001$ ).  
186 Analyses indicated that the Communication Index was significantly higher for the Target VM  
187 relative to the distractors in both test conditions ( $p < 0.0001$ ). As expected, subjects  
188 Communication Index for the Target VM was significantly higher in the Fixed-Location condition  
189 than the Baseline Target condition ( $p < 0.0001$ ). Lastly, we applied a Linear Model analysis to the  
190 determine whether the Communication Index was modulated by elements of the auditory scene  
191 that would indicate its causal relationship with effective communication. This model revealed a  
192 significant relationship between Communication Index and the Coefficient of Variation in the  
193 Distractor VM ICI ( $B=-624.79$ ,  $t(111)=-3.83$ ,  $p=0.000212$ ; Figure 3c, see Methods). In other words,  
194 marmosets were able to engage in longer conversations as a function of the predictability of the  
195 Distractor VM vocal behavior further indicating that this behavioral metric effectively encapsulates  
196 marmosets' propensity to engage in conversations under these conditions.

197

### 198 **Experiment 1.**

199 Here we sought to test how two dimensions of the cocktail party – Distractor Density and Spatial  
200 Configuration – affected marmosets' conversational exchanges. These experiments broadcast 2-  
201 Pulse phee call stimuli from each VM at two Distractor Density levels – High and Low – in three  
202 spatial configurations – Fixed-Location, Random-Location, and Single-Location (Figure 4a).

203 Subjects exhibited a significantly higher Communication Index across all conditions to the  
204 Target VM relative to Distractor VMs at both the High Distractor (2-way ANOVA,  $n=9535$ , VM  
205  $F(4, 9520)=219$ ,  $p < 0.0001$ ; VM\*Spatial  $F(8, 9520)=7.11$ ,  $p < 0.0001$ ) and Low Distractor levels (2-  
206 way ANOVA,  $n=11270$ , VM  $F(4, 11255)=72.7$ ,  $p < 0.0001$ ; VM\*Condition  $F(8, 11255)=4.68$ ,  $p <$   
207  $0.0001$ ). Furthermore, at both Distractor Densities, marmosets exhibited a decrease in  
208 Communication Index in the Random-Location condition, while showing similar behavior in the  
209 other two conditions. The difference in Communication Index with the Random-Location was  
210 more modest at the lower distractor density level, as it only reached statistical significance  
211 compared to Single-Location, but not in Fixed-Location condition (Figure 4b;  $p < 0.0001$  and  $p =$

212 0.0726, respectively). At the higher distractor density, however, Communication Index was  
213 significantly higher in both the Fixed-Location and Single-Location conditions relative to the  
214 Random-Location (Figure 4c;  $p < 0.0001$  and  $p < 0.0001$ , respectively). The pattern of results  
215 suggests that the predictability of the Target VM in space, rather than spatial separability of the  
216 VMs was a key perceptual cue under these conditions.

217 We next performed analyses to determine whether subjects' vocal behavior adapted in  
218 response to changes in the acoustic scene. Subjects produced a lower ratio of 1 pulse calls at  
219 the High Distractor Density level 71.3% to 62.6%, while 2 and 3 pulse calls modestly increased  
220 (Figure 4d); a pattern found to be statistically significant (Kruskall-Wallis,  $X^2(1,n=4140)=32.7$ ,  
221  $p < 0.0001$ ). Figure 4e further shows that there was a significant change in both the average  
222 duration of phee calls (+12.0%), the 1 pulse phee calls (+10.6%), the 3+ pulse calls (+23.3%), but  
223 not 2 pulse phee calls, from Low to High Distractor Density (2-Way ANOVA  $n=4140$ , Acoustic  
224  $F(1,4134)=24.9$ ,  $p < 0.0001$ ; Acoustic\*Pulses  $F(2,4134)=2.39$ ,  $p < 0.0001$ ). Finally, the median  
225 latency within conversations modestly - but significantly - declined from 4.30 to 3.97 (-325 msec)  
226 between the Low to High Distractor Densities, respectively (Figure 4f; Kruskal-Wallis test  
227  $X^2(1,n=1759)=4.06$ ,  $p=0.044$ ). These results indicate that subjects increased the median duration  
228 of their phee calls while simultaneously decreased their response latency to Target VM calls when  
229 communicating at the higher Distractor Density.

230

231

232

## 232 Experiment 2.

233 Primate long-distance contact calls – including marmoset phee calls<sup>32</sup> - typically comprise  
234 multiple, repeated acoustic pulses to maximize signaling efficacy in noisy environments<sup>19, 36, 37</sup>.

235 We hypothesized that if redundancy in call structure was perceptually advantageous to  
236 marmosets, reducing this characteristic of the call would increase the difficulty of maintaining  
237 conversations in some Cocktail Parties. Here we tested subjects in the same Environments as in  
238 Experiment 1 but broadcast 1-pulse phee calls from VMs rather than the 2-pulse phee calls used  
239 in the previous experiment (see Methods: Test Conditions). Given that subjects already struggled  
240 to communicate in the Random-Location condition in Experiment 1, we did not repeat this test  
241 condition here.

242 Similar to Experiment 1, subjects exhibited a significantly higher Communication Index  
243 across all conditions to the Target VM relative to Distractor VMs at both the High Distractor (2-  
244 way ANOVA,  $n=7680$ , VM  $F(4,7670)=168$ ,  $p < 0.0001$ ; VM\*Spatial  $F(4,7670)=7.98$ ,  $p < 0.0001$ )  
245 and Low Distractor levels (2-way ANOVA,  $n=7320$ , VM  $F(4,7310)=294$ ,  $p < 0.0001$ ; VM\*Condition  
246  $F(4,7310)=31.2$ ,  $p < 0.0001$ ). Marmosets exhibited a significantly lower Conversation Index in  
247 the Single-Location relative to the Fixed-Location condition at both the Low (Figure 5a;  $p < 0.0001$ )  
248 and High (Figure 5b;  $p < 0.0001$ ) Distractor Densities. These results suggest that the spatial  
249 separation between the various VMs in the Fixed-Location condition may have afforded  
250 perceptual advantages when only hearing 1-pulse phees emitted by the VMs even at the Low  
251 Distractor Density level.

252 Similar to Experiment 1 marmosets' vocal behavior was affected by the acoustic scene,  
253 though the pattern of changes was notably different from the previous experiment. Figure 5c  
254 shows that there was a significant change in the distribution of the number of pulses per call made  
255 by the subject (Kruskall-Wallis,  $X^2(1,n=3030)=32.7$ ,  $p=0.001$ ). Here, we observed a higher ratio  
256 of 1 pulse calls produced by subjects from Low to High Distractor Density (72.1% to 77.5%).  
257 These changes did not result in a significant overall change in the duration of calls produced by  
258 subjects from Low to High (Figure 5d; 1-Way ANOVA  $n=3030$ ,  $F(1,3028)=0.04$ ,  $p=0.851$ , overall  
259 -0.27%); the significant changes in duration was apparent only when broken down by the number  
260 of pulses in the calls subjects produced (2-Way ANOVA Acoustic\*Pulses  $F(2,3024)=7.94$ ,  
261  $p=0.0004$ ). The 1-pulse calls increased in duration from lower to higher by 5.23% ( $p = 0.0092$ ),  
262 while the 2 pulse and 3+ pulse calls did not change significantly from lower to higher at -1.40%



263 and -13.2%, respectively ( $p = 0.961$  and  $p = 0.0434$ ). We also observed a significant decrease in  
264 latency to respond to the Target VM in conversations at the High Distractor Density level relative  
265 to the lower level (Kruskall-Wallis test,  $X^2(1, n=1447)=9.5$ ,  $p=0.0021$ ), similar to Experiment 1,  
266 though the latency difference was longer in these conditions (520 msec faster response latency  
267 in the High Distractor Density environment, Figure 5e).  
268

### 269 **Emergent Acoustic Scene Dynamics Reveal Adaptive Changes in Vocal Behavior.**

270 Figure 6a shows the distribution of the mean inter-call interval (ICI) against the calculated High  
271 and Low Distractor Density for each session within Fixed-Location and Single-Location.  
272 Significant negative correlations exist between the two values for both Experiments 1 and 2  
273 (Pearson's Linear Correlation:  $\rho = -0.797$  &  $p < 0.0001$ ,  $\rho = -0.928$  &  $p < 0.0001$ , respectively).  
274 The acoustic scene structure revealed by these quantifications emerged because the shorter  
275 duration 1-pulse phee calls necessitated a shorter ICI between VM distractor pairs to ensure  
276 similar levels of Distractor Density between the experiments. While there are other linear  
277 correlations that can be shown, the most significant terms in predicting various behavioral  
278 outcomes in our models included the interactive effect of Distractor ICI and Experimental type.  
279 Thus, this characterization formed the foundation for the subsequent statistical analyses aimed  
280 at characterizing the relationship between the emergent scene structure and marmoset vocal  
281 behavior in these experiments.

282 We applied a linear model to test how facets of marmoset vocal behavior covaried with  
283 dimensions of the acoustic scene. The following were input into the Linear Model – VM Pulse #  
284 (2-pulse:Expt 1, 1-pulse:Expt2), Low and High Distractor Density, and Fixed and Single conditions  
285 – for a total of 144 sessions. We also chose to include the calculated Distractor Density for each  
286 session along with the Distractor ICI (see Methods). Given a strong positive correlation between  
287 Distractor ICI and standard deviation (Pearson's Linear Correlation:  $\rho = 0.931$  and  $p < 0.0001$ ),  
288 we took the coefficient of variance (COV, standard deviation divided by mean) as a way to  
289 encapsulate these two correlated factors while avoiding rank deficiency in any linear model (COV  
290 v Mean ICI, Pearson's Linear Correlation  $\rho = -0.0980$ ,  $p = 0.243$ . Figure 6b). This also gave an  
291 added benefit of enumerating the relative dispersion of the Distractor ICI. This analysis yielded  
292 six total predictor variables.

293 We tested eight interactive linear models which included 22 terms (1 intercept, 6 linear  
294 predictor terms, and 15 pairs of distinct predictor terms). The statistical threshold for significant  
295 terms and models was corrected for multiple comparisons with Bonferroni correction based on  
296  $22 \times 8 = 176$  comparisons with a corrected P value threshold at  $0.05/176 = 0.000284$ . Of these eight  
297 models, three models reached significance: Calls Produced ( $F(21,111) = 3.88$  with adjusted  
298  $R^2=0.314$ ), Conversation Count ( $F(21,111)= 4.19$  with adjusted  $R^2=0.337$ ), and Communication  
299 Index ( $F(21,111) = 5.47$  with adjusted  $R^2=0.415$ ). One significant term was shared across the  
300 three models: The Distractor ICI x 1/2 Pulse (Experiment). COV Distractor ICI x Distractor ICI  
301 (which results in standard deviation Distractor ICI) was significant only for Communication Index.  
302 Figure 6c-f plots the four significant terms against the respective response variables in interaction  
303 effects plots. Each image plots the adjusted response function of the given response variables on  
304 the Y-axis against the values of the first predictor in the interactive term with the second predictor  
305 at fixed values (for categorical: all levels, and numeric: minimum, maximum, and average of  
306 minimum and maximum). Given that all four interactive terms have significant coefficients within  
307 their respective models, and that the slopes of the lines in all four plots are not parallel, there is  
308 significant interactive effect between the predictors for predicting the number of number of calls  
309 produced by the subject, the conversations made in a given session, and the mean Conversation  
310 Index with respect to Target VM and subject.

311 Presenting subjects with VM calls comprising either 2 or 1 pulse phee calls – Experiments  
312 1 and 2, respectively – resulted in opposite effects on the adjusted response variables. For  
313 Conversation Count (Figure 6c), Calls Produced (Figure 6d) and Communication Index (Figure

314 6e), these behavioral metrics revealed a positive correlation with Distractor ICI in Experiment 1,  
315 but a negative relationship in Experiment 2. In other words, when hearing 2-pulse VM calls in  
316 Experiment 1, subjects were more likely to produce more calls, engage in more conversations,  
317 and have higher Communication Index values as the Distractor ICI increased in duration. By  
318 contrast, the opposite was true when hearing only 1-pulse phee calls in Experiment 2. In other  
319 words, different behavioral strategies were needed to optimize communication based on the  
320 specific dynamics of the scene.

321 A further significant factor affecting marmoset vocal behavior in the linear model was COV  
322 Distractor ICI (Figure 6f). As the Distractor ICI increased, at low COV, the mean Communication  
323 Index decreased. At the highest level of COV, the opposite relationship emerged with increasing  
324 Communication Index (with a smaller relative change). This suggests that as the predictability of  
325 the Distractor ICI increased (high to low COV); shorter Distractor ICI were optimal for the subject  
326 to produce calls and engage in more conversations with the Target VM. Similarly, pertaining to  
327 the importance of spatial predictability for marmosets in Experiment 1, temporal predictability was  
328 advantageous for marmosets to navigate the complex acoustic scene and selectively engage with  
329 the Target VM.

330

## 331 **Discussion.**

332 Here we employed an innovative multi-speaker paradigm to construct real-world cocktail parties  
333 and test how a New World primate – common marmosets – resolves the challenges of these  
334 acoustic scenes for active communication. We report that marmosets not only demonstrated a  
335 remarkable ability to overcome the experimental perturbations imposed on them and engage in  
336 conversational exchanges but did so by complementing mechanisms of audition – similarly to  
337 humans<sup>2</sup> – with adaptive modifications of their own vocal behavior. These findings suggest that  
338 elucidating the neural mechanisms that underlie the CPP in human and nonhuman primates may  
339 also need to consider that listeners are active explorers of the world who actively modify their  
340 behavior in response to the changing features of the acoustic scenes to optimize communication  
341 rather than rely solely on audition.

342 Engaging in conversational exchanges in these cocktail parties likely relied on a schema-  
343 based learning mechanism for speaker stream segregation<sup>8, 11, 13</sup>. First, the identity of the Target  
344 VM needed to be learned in each session. While the spectro-temporal structure of marmoset phee  
345 calls is relatively stereotyped, each monkey's phee is individually distinctive and perceptually  
346 recognizable<sup>31, 32</sup>. As a result, segregating one caller's phee call from amongst many conspecific  
347 vocalizations presents a distinct challenge that relies on learning the identity of an interactive  
348 conversational partner. Second, learning the identity of the Target VM was based on its distinctive  
349 vocal behavior. While subjects heard high numbers of calls from Distractor VMs in all conditions,  
350 only the Target VM vocal behavior was designed to be interactive with subjects<sup>28, 29, 33</sup>. Therefore,  
351 marmosets learned the identity of the Target based on the statistical occurrence of VM Target  
352 calls relative to their own rather than anything intrinsic to the vocalizations themselves. Indeed,  
353 evidence suggests that this process took time, as subjects needed ~6mins of a test session to  
354 learn the identity of the Target VM (Figure 2d-f). Third, once the Target VM identity was learned,  
355 marmosets also needed to continuously monitor that conspecifics' behavior in order to coordinate  
356 their own relative vocal behavior for conversations. Marmoset conversations abide social rules  
357 that govern the temporal dynamics of these interactions<sup>28, 29, 30, 33</sup>, but the periodicity of these  
358 exchanges is notably slow. The median interval between conspecific calls in conversations is ~3s,  
359 but it can range up to 10s<sup>29, 33</sup>. The cacophony of marmoset phee calls broadcast in these  
360 experiments – particularly at the high Distractor Density level – created a particularly challenging  
361 environment in which to perceptually track the Target VM. Evidence suggests that marmosets  
362 relied on a reliable spatial cue to focus attention and implement a schema-based mechanism to  
363 solve the CPP.



364 The pattern of results suggest that marmosets employed auditory attention to resolve the  
365 CPP. Experiments in humans involving multiple speakers found that when the spatial position of  
366 each talker randomly changed across locations, subjects' intelligibility scores decreased<sup>7</sup>.  
367 Likewise, human subjects performed significantly better when the spatial location of the target  
368 was cued prior to hearing the sound<sup>38</sup>. In both cases, it was concluded that the predictability of  
369 a talker's position in space allowed subjects to focus attention to that position in space. When that  
370 predictability was eliminated, attention could not be focused, and it accordingly had a negative  
371 impact on subjects' capacity to understand what was spoken. The Random-Location Condition in  
372 Experiment 1 was designed to test whether a similar pattern would emerge in marmosets.  
373 Importantly, the vocal behavior of the VMs (i.e. the acoustic scene) was identical across all three  
374 spatial conditions, and the only difference in the Random-Location condition was a lack of  
375 predictability for the location from which each phee call was broadcast. As shown in Figure 4b,  
376 subjects' exhibited lower Communication Index in Random-Location condition than the other two  
377 spatial configuration, an effect that increased when Distractor Density was higher (Figure 4c).  
378 These results suggest that the spatial predictability, rather than the spatial separability, of the VM  
379 callers was key to resolving the CPP under these conditions suggesting that, like humans<sup>7, 38</sup>,  
380 attentional mechanisms were likely necessary to learn a schema for speaker-stream segregation.

381 Results from Experiment 2 contrasted with Experiment 1 in several important ways that  
382 may reveal an evolutionary relationship between vocal signal design and audition in marmosets.  
383 Nonhuman primate long-distance contact calls – including the marmoset phee – often comprise  
384 the repetition of a single syllable, a signal design feature conjectured to limit degradation of the  
385 signals communicative content when transmitting long distances through noise acoustic  
386 environments<sup>36, 37, 39</sup>. Marmoset phee calls, for example, consist of 1-5 acoustically similar pulses  
387<sup>32</sup>. While marmosets performed similarly in the Fixed- or Single-Location conditions when hearing  
388 2-pulse phee calls in Experiment 1 (Figure 4b,c), marmosets struggled to engage in conversations  
389 when only 1-pulse phee calls were broadcast from a Single-Location in Experiment 2 (Figure  
390 5a,b). In other words, under these conditions spatial-release from masking was necessary to  
391 identify the Target VM and maintain conversational exchanges<sup>40, 41, 42</sup>. By reducing the number  
392 of pulses in each call, we effectively halved the amount of acoustic information available to both  
393 identify the Target VM and recognize it in the cocktail party for subsequent potential interactions.  
394 Indeed, reducing the number of pulses in the contact calls of closely related tamarin monkeys  
395 significantly impaired their ability to recognize the caller's identity<sup>43</sup>. This suggests that the  
396 acoustic redundancy of a two-pulse phee call is crucial to maintaining active conversations in  
397 noisy environments because it provides necessary information about the caller's identity.  
398 Selection for multi-pulsed phee calls in marmoset evolution, and potentially more broadly for other  
399 nonhuman primates<sup>36</sup>, may have been driven by the limits of audition for parsing vocalizations  
400 and recognizing callers amid the myriad of biotic and abiotic noise common in the species forest  
401 habitat.

402 Results from a Linear Model indicated that these primates did not solely rely on audition  
403 to effectively communicate in cocktail parties, but adaptively change their behavior in response to  
404 the dynamics of the acoustic scene<sup>44, 45, 46, 47, 48</sup>. To control for acoustic interference, it was  
405 necessary to decrease the inter-call interval (ICI) between phees in the Distractor VM  
406 conversations which resulted in a systematic change in the periodicity of the Distractor VM  
407 conversation (i.e. variance and inter-call interval). The effect of these cocktail party characteristics  
408 was a tactical change in marmoset vocal behavior based on whether they heard 2-pulse  
409 (Experiment 1) or 1-pulse (Experiment 2) phee calls. When Distractor VM Conversations  
410 comprised 2-pulse phee calls in Experiment 1, marmosets produced more calls (Figure 6c), more  
411 conversations (Figure 6d), and resulted in an increased Conversation Index (Figure 6e) when  
412 Distractor ICI increased. In stark contrast, marmosets exhibited the opposite effect in Experiment  
413 2 when hearing Distractor VM conversations comprising 1-pulse phee calls, biasing all three  
414 facets of vocal behavior to shorter Distractor ICI (Figure 6c-e). In other words, optimizing

415 communicative efficacy relied on a different strategy depending on the call variants produced by  
416 the VMs in the particular acoustic scene. A second adaptive behavioral strategy that emerged  
417 from this model was the influence of the predictability of Distractor VM call timing. Marmoset  
418 overall calling was inversely related with the variance of the Distractor VM ICI (Figure 6f) indicating  
419 that they were significantly more likely to increase Conversation Index when they could reliably  
420 predict the timing of the Distractor VM calls. These patterns of behavior suggest that marmosets  
421 are not simply treating the Distractor VM calls as a broad masker; instead, they are attending to  
422 the dynamics of those conversations as well as their own. In other words, marmoset attention  
423 appears to be divided between the Target VM and Distractor VM vocal behavior to resolve the  
424 challenges of the CPP.

425 The challenges of communicating in cocktail parties is a daily occurrence for human and  
426 nonhuman primates. Results presented here suggest that solving the cocktail party in real-world,  
427 multi-talker environments may be a far more dynamic, active process than is typically considered  
428 <sup>7</sup>. Notably, the unique insights reported here were possible because of the innovative multi-  
429 speaker paradigm developed for these experiments to construct cocktail parties and  
430 systematically manipulate key properties of these social and acoustic landscapes. A broader  
431 implication of these findings is the opportunity to leverage this exciting paradigm to investigate  
432 the neural basis of these perceptual and cognitive mechanisms underlying the CPP in the primate  
433 brain. Neural recordings in human auditory cortex have highlighted the role of attention in  
434 representing speakers in complex acoustic scenes comprising multiple talkers <sup>49, 50</sup>, but relatively  
435 little remains known about how other neural substrates in the auditory system contributes to the  
436 myriad of related processes. Marmosets share the core functional architecture of the auditory  
437 system with all other human and nonhuman primates <sup>16, 18, 51, 52</sup>, and has been a key primate model  
438 of sound processing, including vocalizations, for many years <sup>27, 53, 54, 55, 56</sup>. By integrating existing  
439 technologies for recording neural activity in freely-moving marmosets with the current behavioral  
440 paradigm reported here, the potential to explicate the circuit level mechanisms in the primate brain  
441 that underlie the CPP can be realized.

442  
443

## 444 **Methods.**

445

### 446 **Subjects.**

447 Ten adult marmosets participated as subjects in this study. Six marmosets (3 females and 3  
448 males) were subjects in Experiment 1 and 2 from September 2019 to May 2020. Two of these  
449 subjects (1male and 1 female) as well as four additional adult marmosets (2male and 2 female)  
450 served as subjects in the All Baseline condition in March 2021. All marmosets were social housed  
451 in pair-bonded family units that comprised of two adults, and up to two generations of offspring.  
452 The UCSD Institutional Animal Care and Use Committee approved all experimental procedures.

453

### 454 **Experimental Design.**

455 All experiments were performed in a ~4 X 3 m Radio-Frequency Shielded testing room (ETS-  
456 Lindgren). Individual subjects were transported from their home cage in clear acrylic transport  
457 boxes to the experimental chamber and tested individually. Subjects were placed in an acrylic  
458 and plastic mesh test cage (32 X 18 X 46 cm) designed to allow the animals to climb and jump  
459 freely along the front wall of the cage similarly to previous experiments <sup>28, 31</sup>. The cage was placed  
460 on a rectangular table against the shorter side of the room. Seven speakers (Polk Audio TSi100,  
461 frequency range 40-22,000 Hz) were placed on the opposite side of the room arranged to  
462 maximize distance relative to all other speakers in both the horizontal and vertical planes (Figure  
463 1A). All vocal stimuli were broadcast at 80 dbSPL as measured 0.5 m in front of the speaker. A  
464 cloth occluder divided the room to prevent the subjects from seeing any of the speakers during

465 testing. One directional microphone (Sennheiser, model ME-66) was placed approximately 0.3  
466 m in front of the subject to record all vocalizations produced during a test session. Another  
467 directional microphone was placed in front of the central speaker as well. We tested subjects  
468 three times to each test condition across two experiments while randomized. The order of each  
469 condition within the individual Experiments was counterbalanced across subjects in a block  
470 design for the High and Low Distractor Density levels.

471 Cocktail parties were constructed using an innovative multi-speaker paradigm in which  
472 vocalizations were broadcast from five, software generated Virtual Marmosets (VMs) (Figure 1A).  
473 The unique individual identity of each VM was determined by (1) broadcasting prerecorded  
474 vocalizations from an individual marmoset in the UCSD colony and (2) its vocal behavior relative  
475 to the live subject and other VMs. With respect to this later characteristic, VM vocal behavior was  
476 determined by their designation as a Target or Distractor. Similar to our previous experiments<sup>28</sup>,  
477<sup>31</sup>, the behavior of Target VM was specifically designed to directly engage subjects in the species-  
478 typical natural conversational exchanges by utilizing an interactive playback design. To this end,  
479 the Target VM would broadcast a phee call response within 1-5s with an 85% probability each  
480 time subjects produced a phee call. In successive vocal exchanges between the subject and  
481 target (e.g. a conversational exchange), the Target VM would broadcast a response with 100%  
482 probability to maintain the vocal interaction. If subjects did not produce a call within 15-30s, the  
483 Target VM would broadcast a spontaneous call. Custom-designed software recorded vocal  
484 signals produced by the test subject from the directional microphone positioned in front of the  
485 animal and identified when subjects produced a phee call. By contrast, the timing of Distractor  
486 VM phee calls were independent of subjects' behavior, occurring at a predetermined interval. In  
487 each test condition, we generated two pairs of Distractor VMs. Each pair was designed to directly  
488 engaged each other in conversational exchanges. The timing of phee calls within these  
489 conversations was determined by the parameters of the test condition.

490  
491 **VM Stimulus Sets.** All phee calls used as stimuli in these experiments were recorded from  
492 animals in the UCSD colony using standardized methods in the laboratory described in previous  
493 work<sup>28,31</sup>. Briefly, two monkeys were placed in separate testing boxes positioned ~3m from each  
494 other with an opaque cloth occluder located equidistant between the boxes to eliminate visual  
495 contact between the animals. Directional microphones (Sennheiser ME-66) were placed directly  
496 in front of each subject to record vocal output separately from each animal. Naturally produced  
497 calls were recorded direct to disk over a 30min session. At the conclusion of the session, custom-  
498 designed software was used to extract two-pulse phee calls produced during each session. Phee  
499 calls produced within 10s of a conspecific phee were classified as 'antiphonal' responses, while  
500 those produced after this threshold were classified as 'spontaneous' phee calls. These  
501 designations were based on previous research<sup>33</sup>. Each VM in a test session would only broadcast  
502 antiphonal and spontaneous phee calls from a single marmoset. The stimulus sets used as the  
503 basis for all Target and Distractor VMs was randomized across test sessions. The VMs stimulus  
504 sets used to construct each cocktail party were never produced by animals in a subject's home  
505 cage because of confounds that might occur due to social relatedness<sup>29</sup>. Although marmosets  
506 naturally produce phee calls comprising 1-5 acoustically similar pulses, the modal call variant is  
507 the 2-pulse phee<sup>32</sup>.

508  
509

## 510 **Test Conditions.**

511 We selectively manipulated two dimensions of the scenes - *Spatial Configuration & Distractor*  
512 *Density* - to directly test their respective impact on how marmosets resolved the challenges of  
513 communicating in a cocktail party in two separate experiments distinguished only by the phee call  
514 variant broadcast to subjects. Experiment 1 tested subjects using two-pulse phee calls as

515 vocalization stimuli produced by VM, while Experiment 2 broadcast only 1-pulse phee calls from  
516 the VMs. The 1-pulse calls were created by removing the second pulse in the 2-pulse phee call  
517 repertoire of all the VMs. In general, this would mean half the duration of a the standard 2-pulse  
518 call played in Experiment 1. Subjects were tested three times on each Spatial Configuration at  
519 each Distractor Density. The order of the trials was randomized and counterbalanced across  
520 subjects.

521  
522 **Spatial Configuration.** The spatial location of the VMs was manipulated by broadcasting the  
523 phee stimuli in three different speaker configurations: *Fixed-Location*, *Random-Location* and  
524 *Single-Location* (Figure 3A). These configurations allowed us to contrast the effects of spatial  
525 separation between the callers and the predictability of a caller's position in space on marmoset  
526 vocal behavior.

527 Fixed-Location: In this configuration, the calls of each VM were broadcast from among five  
528 distinct, spatially separated speakers. This scene afforded subjects spatial separability of each  
529 VM from a consistent spatial location for the duration of the experiment. Because this  
530 configuration provided the most consistent perceptual cues to subjects, we also used data from  
531 this condition for comparison of subjects vocal behavior with the Baseline conditions described  
532 below.

533 Random-Location: Like the Fixed-Location condition, VM calls were broadcast from  
534 distinct spatially separated speakers. Rather than each VM broadcast from their own speaker for  
535 the duration of the experiment, speaker location was randomized across all 7 potential speakers  
536 during each broadcast. No VM call would be broadcast from the same speaker twice in a row, nor  
537 was there any overlap in VM calls from the same speaker. As a result, subjects were afforded  
538 spatial segregation of the VMs, but with no predictability for where the VM would emit a call.

539 Single-Location: Here all VM stimuli were broadcast from a single speaker, thereby  
540 eliminating spatial separation of the different callers.

541  
542 **Distractor Density.** Distractor Density was calculated as the ratio of the Target VM calls that  
543 temporally overlapped with Distractor VM calls. This property was manipulated to two levels –  
544 Low and High – by changing the relative inter-call interval between phees broadcast between VM  
545 Distractor pairs. In the 'Low' distractor density scene (~70% acoustic overlap), Distractor VM  
546 conversations had an inter-VM call interval ranging 1 to 3.5 sec in Experiment 1 [2-pulse phee  
547 calls] and 1 to 2.5 sec in Experiment 2 [1-pulse phee calls]. In the 'High' distractor density scenes  
548 (~90% acoustic overlap), Distractor VM conversations had an inter-VM call interval ranging from  
549 0.5 to 1.0 sec in Experiment 1 [two-pulse phee calls] and 0.5-0.75 sec in Experiment 1 [one-pulse  
550 phee calls]. The shorter inter-VM call interval ranges for Experiment 2 were used to maintain the  
551 same level of Distractor Density when the shorter one-pulsed phee calls were used as stimuli.

552  
553  
554 **Baseline Conditions.**

555 Because the long time window over which marmosets perceive calls from conspecifics as a  
556 response to their own (10s)<sup>33</sup>, this condition was designed to test the probability that subjects will  
557 emit vocalizations at times consistent with a vocal response to an actual call (i.e. false positive).  
558 Subjects' vocal behavior under these conditions could, therefore, be compared to the Fixed-  
559 Location to ascertain the which properties were most characteristic of active communication.

560  
561 **Target Baseline.** The following condition was performed to establish the probability of false-  
562 positive responses when marmosets were in Cocktail Party environments comprising multiple  
563 conspecific callers. Subjects were tested in an environment identical to the Fixed-Location  
564 condition with one key exception. Rather than broadcast the calls of the interactive Target VM,



565 here those vocalizations stimuli were not audible to subjects. Rather than broadcast the stimulus,  
566 the timing of that stimulus was recorded in the event log. This allowed us to quantify marmoset  
567 vocal behavior in the same dynamic acoustic scenes as they experienced in the Test Conditions,  
568 but without an interactive conversational partner. Subjects were tested three times in the Target  
569 Baseline trials for both High and Low Distractor Densities in Experiments 1 and 2. These trials  
570 were randomized and counterbalanced with the Test Condition trials.

571  
572 **All Baseline.** Our initial experiment tested subjects only in the Target Baseline condition. We  
573 later determined that quantifying subjects' vocal behavior in the absence of any conspecific calls  
574 would be important to determine how marmoset vocal behavior differed in the Cocktail Party  
575 environments relative to when they heard no conspecifics. These trials were identical to the  
576 Target Baseline condition except that we did not broadcast the Distractor VM calls. In other words,  
577 subjects heard no marmoset calls. We tested six subjects three times on this condition.

578

### 579 **Statistics**

580 A two-tailed One-sample Kolmogorov-Smirnov test was used to inspect most data for normality  
581 like Communication Index. N-way ANOVAs (1,2, and 3) were performed on data sets using the  
582 anovan function in MATLAB. If there were significant main or interactive results, post-hoc multiple  
583 comparisons were corrected by Tukey's Honestly Significant Difference Procedure within the  
584 multcompare function in MATLAB. For distribution tests, we used Kruskal-Wallis. 95% confidence  
585 intervals were two-tailed [0.025, 0.975] based on standard error. Bresuch-Pagan was used to test  
586 heteroskedasticity of residuals. Normality tests of the residuals used the Lilliefors test.

587

### 588 **Data Analysis.**

589 We calculated the following behavioral metrics to quantify changes in subject vocal behavior  
590 relative to the Target and Distractor VMs as well as standard acoustic parameters, such as call  
591 duration and response latency.

592

593 **Communication Index.** Our analyses focused on marmoset conversations to explore how these  
594 monkeys solved the CPP because this social behavior is indicative of an active, coordinated  
595 communication exchange between marmosets<sup>28, 30</sup>. Previous experiments in marmosets  
596 determined that phee calls produced within 10s following a conspecific phee call were perceived  
597 as a 'response' to the initial call by conspecifics and were significantly more likely to elicit a  
598 subsequent vocal response, while those produced after this threshold did not elicit vocal  
599 responses from conspecifics<sup>33</sup>. We defined a conversation as each behavioral epochs in which  
600 two individuals engage in a series of alternating, reciprocal phee exchanges during which the  
601 inter-call interval between conspecific phee calls is  $\leq 10s$ <sup>28, 57</sup>. Each conversation ended when  
602 the subject did not produce a phee call within 10s of the offset of the preceding Target VM call.

603 We calculated a Communication Index to quantify the relationship between phee calls  
604 produced in conversations weighted by its length relative to all phees produced by the subject in  
605 a session (Figure 3A). By adopting a single behavioral metric, we were able to directly compare  
606 subjects' behavior across different test conditions. To calculate the Communication Index, we  
607 first identified all instances of phee calls produced by subjects in a test session. Subjects calls in  
608 these conversational exchanges were assigned a number based on their linear order in the vocal  
609 exchanges sequence. In other words, the first response was assigned 1, the second successive  
610 response was assigned 2, etc. Spontaneously produced calls and phees produced as the  
611 initiating call of a conversation by subjects were assigned 0. These numbers were summed and  
612 divided by the total number of phee calls produced in the session (Figure 2B).

613



614 **Interference Ratio.** We measured the temporal overlap between the Distractor VMs calls and  
615 the Target VM calls to determine the amount of acoustic interference that occurred. Each time a  
616 Target VM call was broadcast, we measured the duration of time it temporally co-occurred with  
617 the duration of any Distractor VM call. The resultant ratio indicates the percentage of overlap in  
618 time between Target and Distractor VM calls.

619  
620 **Pulse-Number Index.** Custom software extracted all phee calls produced by subjects in each  
621 test session and identified the number of pulses within these calls based on previously identified  
622 stereotyped spectro-temporal structure of these vocalizations<sup>32</sup>. Once cataloged, we then  
623 compared the number phee calls produced that comprised 1, 2 or 3+ pulses. Previous studies  
624 have shown that the modal marmoset phee variant consist of 2-pulses, while the other variants  
625 occur at lower frequency<sup>32</sup>. Phee calls consisting of 3 or more pulse calls were rarely produced  
626 in the current experiments, accounting for <10% of calls, these were grouped together. Because  
627 the number of phee calls comprising 3+ pulses did not vary across the test conditions, these were  
628 excluded from this this metric. We generated the Pulse-Number Index by calculating the  
629 difference over the sum of the 1 and 2 pulsed phee calls produced in each session  
630  $[(1PulseRatio - 2PulseRatio)/(1PulseRatio + 2PulseRatio)]$ . Positive values would indicated a  
631 bias towards 1-Pulse Phee calls, while a negative value reflects a bias towards 2-pulse Phee  
632 Calls.

633  
634 **Estimated PDF.** The estimated PDF was calculated using the MATLAB function `ksdensity` with  
635 Kernel set to normal, function to PDF, Boundary Correction to reflection, and the support set at 0  
636 to the maximum value found in the distribution for a given plot. Confidence intervals within  
637 Estimated PDFs (Figure 2A,C) were created by getting a `ksdensity` plot at the same support  
638 boundaries for each session for a given distribution and then finding the mean and 95%  
639 confidence intervals for the same x-positions.

640  
641 **Cumulative counts.** For Figure 2B,D, we subdivided each recorded session into one second  
642 bins and counted how many events occurred for the required analysis in each bin. Then we took  
643 the cumulative sum and divided it by the sum for each session to get the normalized plots. Each  
644 session's cumulative distribution for the respective data was then put collapsed by mean and 95%  
645 confidence intervals. Preliminary tests showed a normal distribution for each respective bin.

646  
647 **Latency in conversation.**  
648 As mentioned previously, conversations were defined by two or more consecutive responses by  
649 the subject to the target within the antiphonal delay (10 sec). All calls produced by the subject and  
650 Target VM that occurred within call exchanges that had at least 2 subject responses was included.  
651 In cases where the subject initiated the conversation, a third subject call would be needed to be  
652 included. The latency of the subject to respond within the sequence of exchanges was used for  
653 analysis.

654  
655 **Linear Model Analysis.**  
656 The following were input into the Linear Model – VM Pulse # (2-pulse:Expt 1, 1-pulse:Expt2), Low  
657 and High Distractor Density, and Fixed and Single conditions – for a total of 144 sessions. We  
658 also chose to include the calculated Distractor Density for each session along with the Distractor  
659 ICI (see Methods for more details on setup). Given a strong positive correlation between  
660 Distractor ICI and standard deviation (Pearson's Linear Correlation:  $\rho = 0.931$  and  $p < 0.0001$ ),  
661 we took the coefficient of variance (COV, standard deviation divided by mean) as a way to  
662 encapsulate these two correlated factors while avoiding rank deficiency in any linear model (COV  
663 v Mean ICI, Pearson's Linear Correlation  $\rho = -0.0956$ ,  $p = 0.254$ . Figure 5B). This also gave an  
664 added benefit of enumerating the relative dispersion of the Distractor ICI. This analysis yielded

665 six total predictor variables. The following 8 vocal behavior response variables were also inputted  
666 into the model: the mean duration of all calls, the duration of the 1-Pulse calls, Index of relative 1  
667 and 2 pulse calls produced by subjects (Pulse Number Index), the mean Communication Index,  
668 subjects mean latency to respond in a conversation, the number of subject calls produced, the  
669 number of conversations, and the mean length of those conversations. We performed analyses  
670 only on the Fixed-Location and Single-Location conditions because the Random-Location was  
671 not performed in Experiment 2.

672  
673 **Response Variables.** These metrics were used as response variables within our linear models  
674 as mentioned in the Results section. Each one was calculated for each recorded session within  
675 a given experimental condition (18 per condition).

- 676 • *Average Duration of Calls:* The mean duration of subject calls.
- 677 • *Duration of 1 Pulse Calls:* Mean duration of 1-pulse calls produced by the subject
- 678 • *Pulse-Number Index:* The difference over sum of the ratio of one pulse calls to two  
679 pulse calls produced by the subject.
- 680 • *Communication Index:* The mean position of the subject calls as previously  
681 mentioned.
- 682 • *Response Latency in Conversation:* The mean latency of subjects to respond to  
683 Target VM within a conversational exchange.
- 684 • *Number of Calls:* Number of calls produced by the subject in a given session.
- 685 • *Number of Conversations:* The number of times the subject engaged in  
686 conversational exchanges.
- 687 • *Length of Conversations:* The mean number of subject calls produced within each  
688 conversation.
- 689

690 **Design.** MATLAB function 'fitlm' was used to fit six predictor variables to each of the 8 response  
691 variables thus creating 8 linear models of comparison on 144 observations per model. The six  
692 predictor variables were: the calculated Distractor Density (as seen in Figure 3B,C and Figure  
693 4A,B), Distractor ICI, COV Distractor ICI, the categorical Distractor Density (Low or High), the  
694 categorical spatial configuration (Fixed or Single), and the categorical Experiment (2-Pulse or 1-  
695 Pulse). An interactive linear model was created that included an intercept term (1), linear term for  
696 each predictor (6), and products of pairs of distinct predictors excluding squared terms (15), for a  
697 total of 22 predictor terms. The 8 models created with 22 predictor terms were corrected for  
698 multiple comparisons using the Bonferroni correction. With a criterion at  $\alpha = 0.05$ , the new p-value  
699 threshold was calculated to be at  $0.05/176 = 0.000284$ . Any model's F-test for a degenerate  
700 constant model that was below this threshold was included for further analysis of the terms. Three  
701 models reached this threshold as mentioned in the results. Of those three, only terms with  
702 coefficients that were significantly different from 0 below the corrected new significance threshold  
703 were subsequently explored in Figure 5C-G.

704  
705 **Test of Assumptions.** The significant models' residuals were finally looked at to test for  
706 homoscedasticity and normality of the residuals. All three initial models (Number of Calls, Number  
707 of Conversations, Communication Index) failed the normal distribution ( $p=0.0125, 0.0179, 0.001$ ),  
708 but the homoscedasticity was preserved in the models (Breusch-Pagan test,  $df=6, p = .4724,$   
709  $0.0603, 0.6832$ ). Looking at the normal plots, there was clear evidence of some outliers in the  
710 data. Taking the residuals from the Communication Index model, we removed residual outliers  
711 1.5 times outside the quartiles at 25% and 75% of the data. Of the 144 points, eight points were  
712 outliers along with 3 NaNs (7.64%) that were removed. After removal, the same three models  
713 were once more analyzed. The reported final values in the Results section indicate these new  
714 values. All three had normal distributions of the residuals as indicated by a failure to reject the

715 null hypothesis of normality by the Lilliefors test ( $p=0.270, 0.111, 0.0684$ ). As well, the model for  
716 Communication Index and Number of Calls failed to reject the null-hypothesis of homoscedasticity  
717 in the Breusch-Pagan test with studentized Koenker's statistic (Breusch-Pagan test,  $df=6$ ,  
718  $p=0.147, 0.959$ ), while the model for Number of Conversations was on the threshold ( $p = 0.0406$ ).  
719 We finally looked at the collinearity of the predictor variables and found that of the three  
720 continuous variables (Distractor ICI, COV Distractor ICI, and Distractor Density), none of them  
721 exhibited multicollinearity as determined by the Belsley collinearity diagnostics (Condition indices  
722 for the three 1, 5.96, 12.3).  
723  
724

725 **Data Availability**

726 The data generated during the experiment along with the associated analyses and figure  
727 creations done for the paper have been deposited in Dryad with the primary access to create the  
728 figures and the statistical tests mentioned in the manuscript can be found in the Dryad repository  
729 with the identifier doi:10.6076/D1RG6V and can be permanently found at this link  
730 <https://datadryad.org/stash/dataset/doi:10.6076/D1RG6V>

731

732 **Acknowledgements.**

733 We thank Victoria Ngo and Madeline Gagne for assistance in data collection and Drs. Yi Zhou  
734 and Vatsun Sadagopan for comments and discussion on an earlier draft of this manuscript. This  
735 work supported by grants from NIH (R01 DC012087) and DARPA (SSC-5029) to CTM.

736

737

738 **Ethics Statement.**

739 This study was performed in strict accordance with the recommendations in the Guide for the  
740 Care and Use of Laboratory Animals of the National Institutes of Health. All of the animals were  
741 handled according to approved institutional animal care and use committee (IACUC) protocols  
742 and approved by the University of California San Diego (#S09147).

743

744 **Author Contributions.**

745 VJ designed the experiments, collected the data, analyzed the data and wrote the manuscript.

746 CM designed the experiments, oversaw data collection and analysis and wrote the manuscript.

747

748 The Authors declare no competing interests.

749 **Literature Cited.**

750  
751  
752  
753  
754  
755  
756  
757  
758  
759  
760  
761  
762  
763  
764  
765  
766  
767  
768  
769  
770  
771  
772  
773  
774  
775  
776  
777  
778  
779  
780  
781  
782  
783  
784  
785  
786  
787  
788  
789  
790  
791  
792  
793  
794  
795  
796  
797  
798  
799

1. Cherry EC. Some experiments on the recognition of speech, with one and with two ears. *J Acoust Soc Am* **25**, 975-979 (1953).
2. Mcdermott JH. The cocktail party problem. *Current Biology* **19**, R1024-R1027 (2009).
3. Bee MA, Micheyl C. The cocktail party problem: What is it? How can it be solved? And why should animal behaviorists study it? *J Comp Psych* **122**, 235-251 (2008).
4. Bronkhorst AW. The cocktail-party problem revisited: early processing and selection of multi-talker speech. *Attention, Perception, & Psychophysics* **77**, 1465-1487 (2015).
5. Darwin CJ. Auditory grouping. *Trends in Cognitive Sciences* **1**, 327-333 (1997).
6. Brungart DS, Simpson BD. The effects of spatial separation in distance on the informational and energetic masking of a nearby speech signal. *J Acoust Soc Am* **112**, 664-676 (2002).
7. Brungart DS, Simpson BD. Cocktail party listening in a dynamic multitalker environment. *Perception & Psychophysics* **69**, 79-91 (2007).
8. Bregman AS. *Auditory Scene Analysis: The Perceptual Organization of Sound*. MIT Press (1994).
9. Hill KT, Miller LM. Auditory Attentional Control and Selection during Cocktail Party Listening. *Cerebral Cortex* **20**, 583-590 (2009).
10. Darwin CJ, Hukin RW. Effects of reverberation on spatial, prosodic, and vocal-tract size cues to selective attention. *The Journal of the Acoustical Society of America* **108**, 335-342 (2000).
11. Woods KJP, McDermott JH. Schema learning for the cocktail party problem. *PNAS* **115**, E3313 (2018).
12. Johnsrude IS, Mackey A, Hakyemez H, Alexander E, Trang HP, Carlyon RP. Swinging at a Cocktail Party: Voice Familiarity Aids Speech Perception in the Presence of a Competing Voice. *Psych Sci* **24**, 1995-2004 (2013).
13. Bey C, McAdams S. Schema-based processing in auditory scene analysis. *Perception & Psychophysics* **64**, 844-854 (2002).
14. Darwin CJ. Listening to speech in the presence of other sounds. *Philosophical Transactions of the Royal Society B: Biological Sciences* **363**, 1011-1021 (2008).
15. Kaas JH. Sensory and motor systems in primates. In: *Primate Neuroethology* (eds Platt M, Ghazanfar AA). Oxford University Press (2010).
16. Kaas JH, Hackett TA. Subdivisions of auditory cortex and processing streams in primates. *PNAS* **97**, 11793-11799 (2000).



- 800 17. Kaas JH, Hackett TA. Subdivisions of auditory cortex and levels of processing in primates.  
801 *Audiology and Neuro-Otology* **3**, 73-85 (1998).  
802
- 803 18. Hackett TA. The evolution of primate and human auditory system. In: *Evolutionary*  
804 *Neuroscience* (ed Kaas JH). Academic Press (2009).  
805
- 806 19. Waser PM, Brown CH. Habitat acoustics and primate communication. *Am J Primatol* **10**,  
807 135-154 (1986).  
808
- 809 20. Miller CT, Dibble E, Hauser MD. Amodal completion of acoustic signals by a nonhuman  
810 primate. *Nature Neuroscience* **4**, 783-784 (2001).  
811
- 812 21. Petkov CI, O'Connor KN, Sutter ML. Illusory sound perception in macaque monkeys. *J*  
813 *Neurosci* **23**, 9155-9161 (2003).  
814
- 815 22. Micheyl C, Tian B, Carlyon RP, Rauschecker JP. Perceptual organization of tone  
816 sequences in the auditory cortex of awake Macaques. *Neuron* **48**, 139-148 (2005).  
817
- 818 23. Micheyl C, Carlyon RP, Shtyrov Y, Hauk O, Dodson T, Pullvermuller F. The  
819 neurophysiological basis of the auditory continuity illusion: A mismatch negativity study. *J*  
820 *Cog Neurosci* **15**, 747-758 (2003).  
821
- 822 24. Shinn-Cunningham BG. Object-based auditory and visual attention. *Trends in Cognitive*  
823 *Sciences* **12**, 182-186 (2008).  
824
- 825 25. Wood NL, Cowan N. The cocktail party phenomenon revisited: Attention and memory in  
826 the classic selective listening procedure of Cherry (1953). *Journal of Experimental*  
827 *Psychology: General* **124**, 243-262 (1995).  
828
- 829 26. Bronkhorst AW. The cocktail party phenomenon: A review of research on speech  
830 intelligibility in multiple-talker conditions. *Acustica* **86**, 117-128 (2000).  
831
- 832 27. Eliades SJ, Miller CT. Marmoset vocal communication: Neurobiology and behavior.  
833 *Developmental Neurobiology* **77**, 286-299 (2017).  
834
- 835 28. Toarmino C, Wong L, Miller CT. Audience affects decision-making in a marmoset  
836 communication network. *Biology Letters* **13**, 20160934 (2017).  
837
- 838 29. Miller CT, Wang X. Sensory-motor interactions modulate a primate vocal behavior:  
839 antiphonal calling in common marmosets. *Journal of Comparative Physiology A* **192**, 27-  
840 38 (2006).  
841
- 842 30. Chow C, Mitchell J, Miller CT. Vocal turn-taking in a nonhuman primate is learned during  
843 ontogeny. *Proceedings of the Royal Society, B* **282**, 210150069 (2015).  
844
- 845 31. Miller CT, Thomas AW. Individual recognition during bouts of antiphonal calling in common  
846 marmosets. *Journal of Comparative Physiology A* **198**, 337-346 (2012).  
847
- 848 32. Miller CT, Mandel K, Wang X. The communicative content of the common marmoset phee  
849 call during antiphonal calling. *Am J Primatol* **72**, 974-980 (2010).  
850

- 851 33. Miller CT, Beck K, Meade B, Wang X. Antiphonal call timing in marmosets is behaviorally  
852 significant: Interactive playback experiments. . *Journal of Comparative Physiology A* **195**,  
853 783-789 (2009).  
854
- 855 34. Levinson SC. Turn-taking in human communication: Origins and implications for language  
856 processing. . *Trends in Cognitive Science* **20**, 6-14 (2016).  
857
- 858 35. Stivers T, *et al.* Universals and cultural variation in turn-taking in conversation. *PNAS* **106**,  
859 10587-10592 (2009).  
860
- 861 36. Mitani J, Stuht J. The evolution of nonhuman primate loud calls: acoustic adaptation for  
862 long-distance transmission. *Primates* **39**, 171-182 (1998).  
863
- 864 37. Morrill R, Thomas AW, Schiel N, Souto A, Miller CT. The effect of habitat acoustics on  
865 common marmoset vocal signal transmission. *Am J Primatol*, 904-916 (2013).  
866
- 867 38. Kidd G, Arbogast TL, Mason CR, Gallun FJ. The advantage of knowing where to listen.  
868 *The Journal of the Acoustical Society of America* **118**, 3804-3815 (2005).  
869
- 870 39. Waser PM, Waser MS. Experimental studies of primate vocalization - specializations for  
871 long-distance propagation. *Zeit Tierpsychol* **43**, 239-263 (1977).  
872
- 873 40. Pastore MT, Yost WA. Spatial Release from Masking with a Moving Target. *Frontiers in*  
874 *Psychology* **8**, (2017).  
875
- 876 41. Litovsky RY. Speech intelligibility and spatial release from masking in young children. *The*  
877 *Journal of the Acoustical Society of America* **117**, 3091-3099 (2005).  
878
- 879 42. Jones GL, Litovsky RY. A cocktail party model of spatial release from masking by both  
880 noise and speech interferers. *The Journal of the Acoustical Society of America* **130**, 1463-  
881 1474 (2011).  
882
- 883 43. Miller CT, Iguina C, Hauser MD. Processing vocal signals for recognition during antiphonal  
884 calling. *Anim Behav* **69**, 1387-1398 (2005).  
885
- 886 44. Miller CT, Eliades SJ, Wang X. Motor-planning for vocal production in common marmosets  
887 *Anim Behav* **78**, 1195-1203 (2009).  
888
- 889 45. Zhao L, Rad BB, Wang X. Long-lasting vocal plasticity in adult marmoset monkeys.  
890 *Proceedings of the Royal Society B: Biological Sciences* **286**, 20190817 (2019).  
891
- 892 46. Pomberger T, Risueno-Segovia C, Gultekin YB, Dohmen D, Hage SR. Cognitive control  
893 of complex motor behavior in marmoset monkeys. *Nature Communications* **10**, 3796  
894 (2019).  
895
- 896 47. Pomberger T, Löschner J, Hage SR. Compensatory mechanisms affect sensorimotor  
897 integration during ongoing vocal motor acts in marmoset monkeys. *European Journal of*  
898 *Neuroscience* **n/a**.  
899
- 900 48. Roy S, Miller CT, Gottsch D, Wang X. Vocal control by the common marmoset in the  
901 presence of interfering noise. *J Exp Biol* **214**, 3619-3629 (2011).

- 902  
903 49. Mesgarani N, Chang EF. Selective cortical representation of attended speaker in multi-  
904 talker speech perception. *Nature* **485**, 233-236 (2012).  
905  
906 50. Khalighinejad B, Herrero JL, Mehta AD, Mesgarani N. Adaptation of the human auditory  
907 cortex to changing background noise. *Nature Communications* **10**, 2509 (2019).  
908  
909 51. Bendor DA, Wang X. Neural response properties of the primary, rostral and rostrotemporal  
910 core fields in the auditory cortex of marmoset monkeys. *J Neurophys* **100**, 888-906 (2008).  
911  
912 52. de la Mothe LA, Blumell S, Kajikawa Y, Hackett TA. Cortical connections of the auditory  
913 cortex in marmoset monkeys: core and medial belt regions. *J Comp Neurol* **496**, 27-71  
914 (2006).  
915  
916 53. Miller CT, Freiwald W, Leopold DA, Mitchell JF, Silva AC, Wang X. Marmosets: A  
917 Neuroscientific Model of Human Social Behavior. *Neuron* **90**, 219-233 (2016).  
918  
919 54. Wang X. The harmonic organization of auditory cortex. *Frontiers in Neuroscience* **7**,  
920 2013.00114 (2013).  
921  
922 55. Wang X, Walker KMM. Neural mechanisms for the abstraction of pitch information in  
923 auditory cortex. *J Neurosci* **32**, 13339-13342 (2012).  
924  
925 56. Song X, Osmanski MS, Guo Y, Wang X. Complex pitch perception mechanisms are  
926 shared by humans and a New World monkey. *PNAS* **113**, 781-786 (2016).  
927  
928 57. Nummela S, Jovanovic V, de la Mothe LA, Miller CT. Social context-dependent activity in  
929 marmoset frontal cortex populations during natural conversations. *J Neurosci* **37**, 7036-  
930 7047 (2017).  
931  
932

## 933 Figures

a

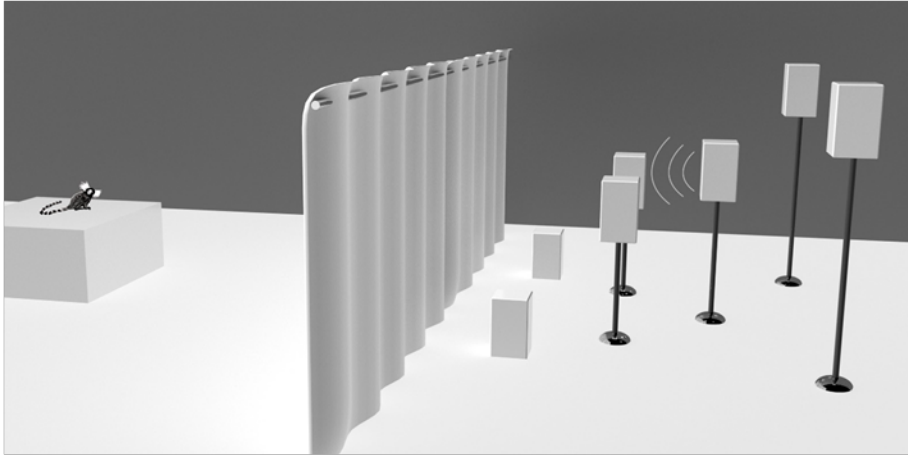

b

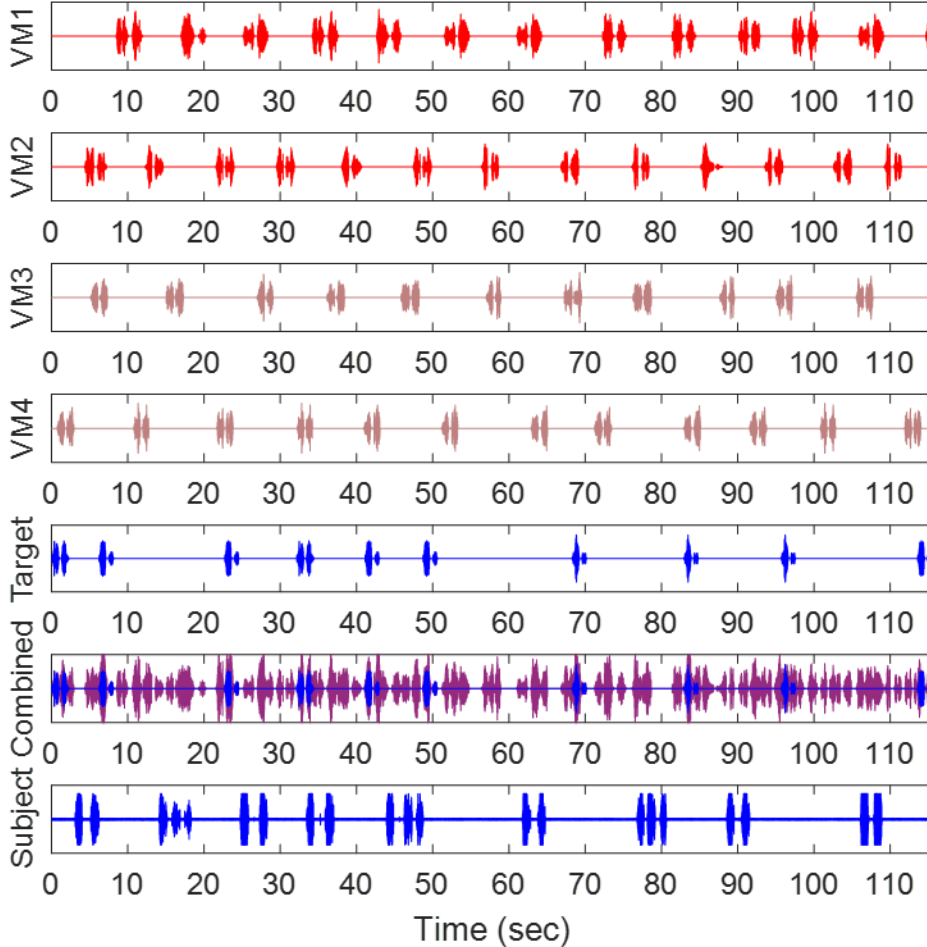

934  
935  
936  
937

**Figure 1.** Design of the marmoset Cocktail Party experiments. (a) Schematic drawing of the spatial configuration of the testing room. Subjects were placed in a clear acrylic box with a mesh front (box around subject not pictured). Seven speakers were positioned to have spatial

938 separation in height, distance and width. An opaque curtain was placed equidistant between the  
939 subject and speakers to occlude visual access. (b) An exemplar two-minute sample of the  
940 vocalizations broadcast by the Virtual Monkeys (VM) and a live marmoset subject from a High  
941 Distractor Density, Fixed-Location session in Experiment 1. VM 1-4 are Distractors. VM1 and VM2  
942 (shown in red) have been designed to broadcast 2-pulse phee calls that reflect a conversation  
943 with each other, while VM3 and VM4 (shown in brown) are likewise designed to engage in a  
944 reciprocal conversational exchange. The Target VM (blue) is engaged with the live marmoset  
945 Subject in an interactive reciprocal exchange based on subjects' vocal behavior. The combined  
946 view shows the summation of all VM phee calls – Distractors (purple) and Target (blue).  
947  
948



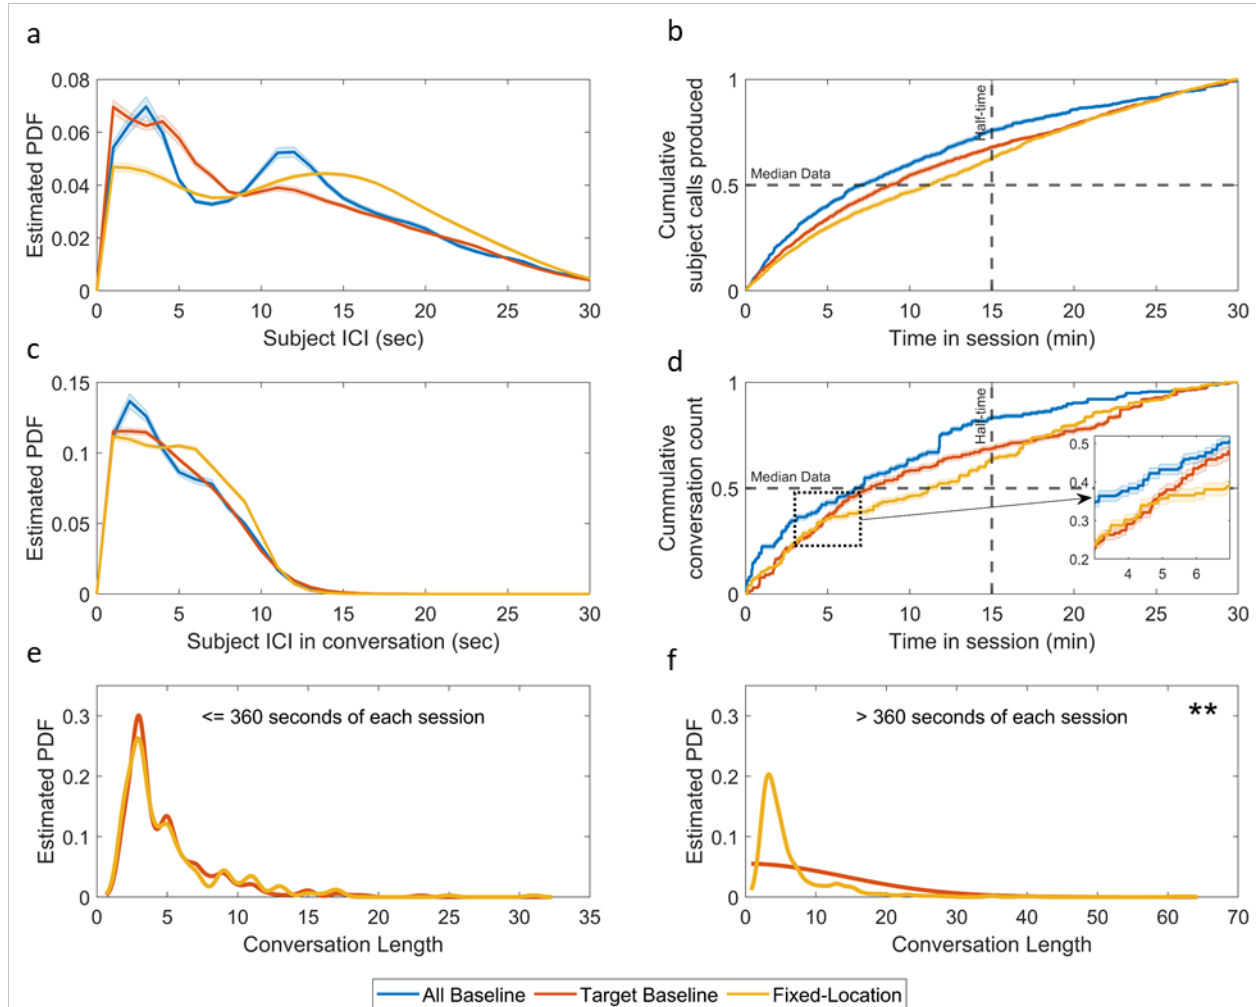

949  
950  
951  
952  
953  
954  
955  
956  
957  
958  
959  
960  
961  
962

**Figure 2.** Comparison of marmoset vocal behavior in three 'Baseline' conditions: All Baseline, Target Baseline and Fixed-Location (n = 18 for each). (a) Distribution of subject inter-call interval from offset to onset of subsequent subject calls that were spontaneous or the initiations of conversations. 95% CI in shaded areas. (b) Cumulative distribution of subject calls produced normalized for comparison across baselines. 95% CI in shaded areas. Median data refers to 50% of all calls produced by the subject in a session. Half time refers to half of the duration of a session. (c) Distribution of subject inter-call interval only within conversations that contain at least two subject responses. 95% CI in shaded areas. (d) Cumulative distribution of conversations counts as mentioned before. Insert shows an expanded view from 3 to 7 minutes. 95% CI in shaded areas. (e) Estimated PDF for all conversation lengths of at least 2 or more subject calls for the first six minutes of all sessions. (f) Estimated PDF for all conversation lengths of at least 2 or more subject calls after the first six minutes of all sessions (> 360s). \*\* p-value < 0.001.

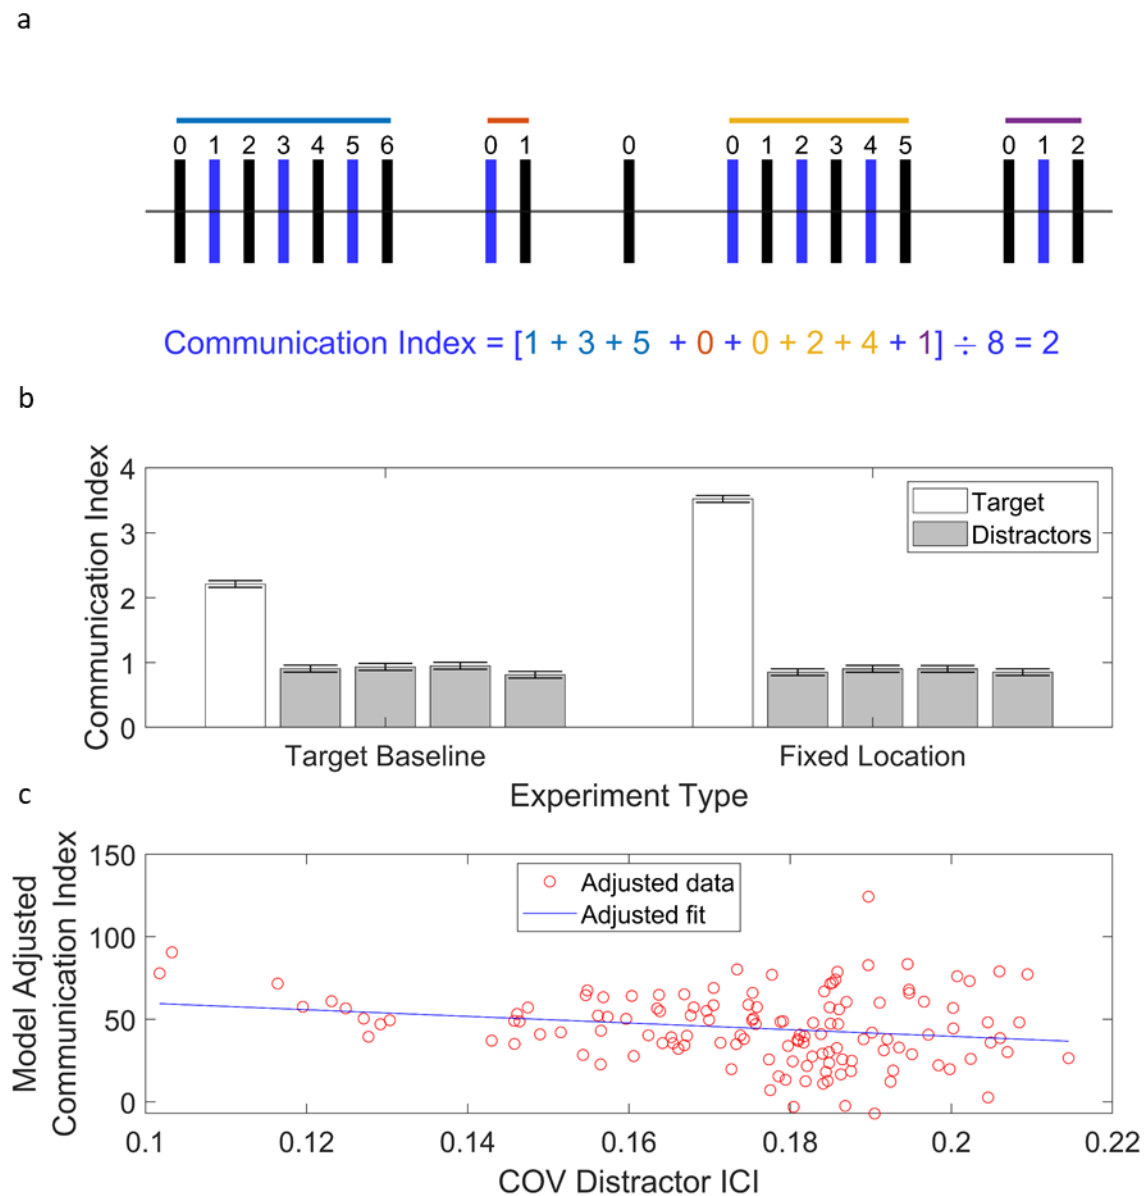

963  
 964 **Figure 3.** Communication Index. (a) Schematic showing an abstract exchange of phee calls  
 965 between a VM and a subject. Black bars indicate calls produced by the Target VM while blue bars  
 966 indicate calls produced by subjects. Colored horizontal lines above indicate vocal exchanges with  
 967 varying lengths (6, 1, 5, 2). Each call produced by the subject within a vocal exchange is labeled  
 968 by zero-based numbering. These values are summed and divided by the total number of calls  
 969 produced in the session. (b) Bar plot showing the calculated Communication Index distributions  
 970 in comparison to each VM across the Target Baseline and Fixed Location conditions. Error bars  
 971 represent 95% Confidence Interval and multiple comparison corrected. Target VM differences  
 972 were significant at  $p < 0.0001$ . (c) Linear Model outcome shows a significant relationship between  
 973 the predictability of Distractor VM calls (Coefficient of Variance of the Distractor Inter-call Interval  
 974 (ICI)) and Communication Index ( $B = -624.79$ ,  $t(111) = -3.83$ ,  $p = 0.000212$ ).  
 975

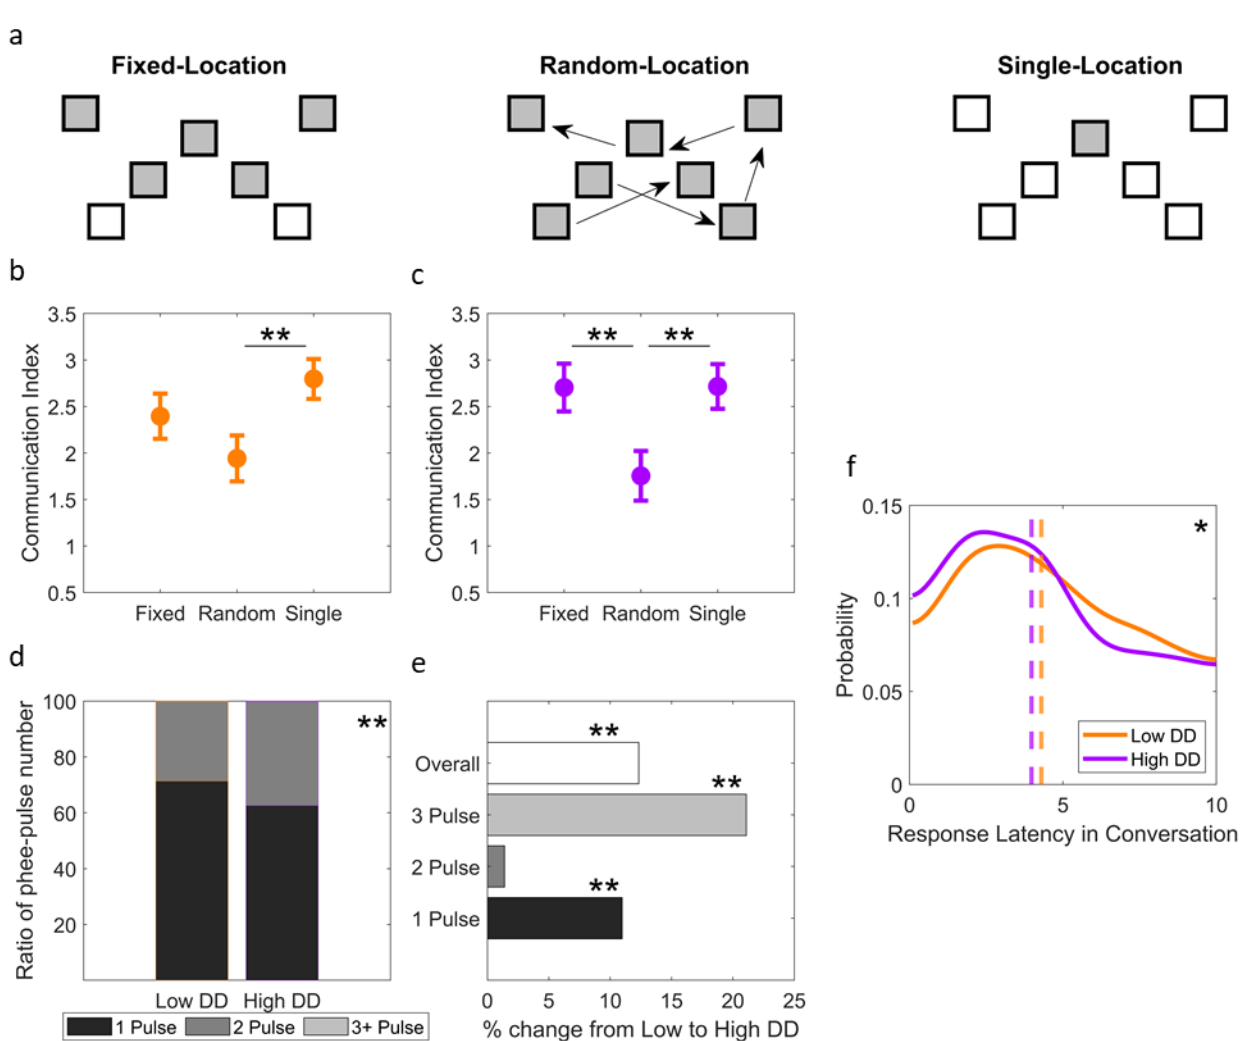

976  
 977 **Figure 4.** Results from Experiment 1. (a) A schematic drawing of the spatial configuration of the  
 978 seven speakers used in these three test conditions from above: Fixed-Location, Random-  
 979 Location, and Single-Location. Grey shading indicates which speakers broadcast phee calls for  
 980 that condition. Arrows in the Random-Location condition indicate the fact that the speaker location  
 981 from which each VM phee was broadcast was randomized for each stimulus presentation across  
 982 the seven-speakers. (b, c) Plots the Mean Communication Index [95% CI] for Fixed-Location,  
 983 Random-Location, and Single-Location test conditions. \*\* Significant difference between two  
 984 conditions,  $p < 0.0001$ . (b) Plots Communication Index for the Low Distractor Density condition,  
 985 while (c) plots results from the High Distractor Density condition. (d) Stacked bar graph showing  
 986 the distribution phee calls produced by subjects that comprised 1-Pulse (black), 2-Pulses (dark  
 987 grey) and 3 or more pulses (light grey, though too small to see) in both the Low DD and High DD  
 988 environments. \*\* Significant difference between distributions,  $p < 0.0001$  (e) The change in  
 989 duration of all calls, and sub-groups of phee-pulse calls from Low to High Distractor Density (DD)  
 990 is shown as percent change. \*\* Significant difference for that category,  $p < 0.0001$ . (f) Estimated  
 991 PDF of subjects' latency to respond to the Target VM in conversations in both Low DD (red) and  
 992 High DD (blue) conditions. The median value is shown as a dashed vertical red bar – Low DD –  
 993 and blue bar – High DD. \* Significant difference between distributions,  $p < 0.05$ .

994  
 995

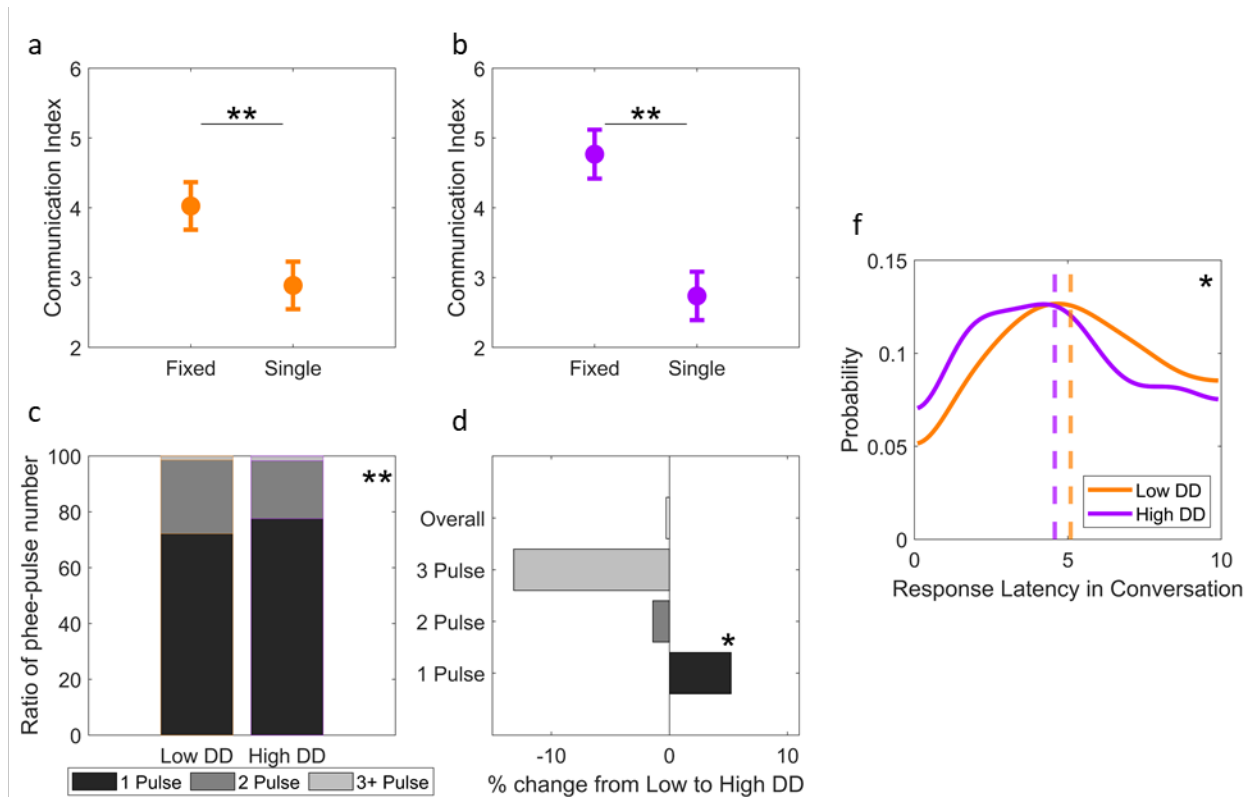

996  
 997 **Figure 5.** Results from Experiment 2. (a, b) Plots the Mean Communication Index [95% CI] for  
 998 Fixed-Location and Single-Location test conditions. \*\* Significant difference between two  
 999 conditions,  $p < 0.0001$ . (a) Plots Communication Index for the Low Distractor Density condition in  
 1000 red, while (b) plots the High Distractor Density condition in blue. (c) Stacked bar graph showing  
 1001 the distribution phee calls produced by subjects that comprised 1-Pulse (black), 2-Pulses (dark  
 1002 grey) and 3 or more pulses (light grey) in both the Low and High Distractor Density (DD)  
 1003 environments. \*\* Significant difference between distributions,  $p < 0.0001$  (d) The change in  
 1004 duration of the phee calls comprising 1, 2, 3 and Overall duration is shown as percent change  
 1005 from Low DD to High DD conditions. \* Significant difference for that category,  $p < 0.001$  (e)  
 1006 Probability density estimate plots of subjects' latency to respond to the Target VM in  
 1007 conversations in both Low DD (red) and High DD (blue) conditions. The median value is shown  
 1008 as a dashed, vertical red line – Low DD – and blue line – High DD. \* Significant difference for that  
 1009 category,  $p < 0.001$ .

1010  
 1011  
 1012

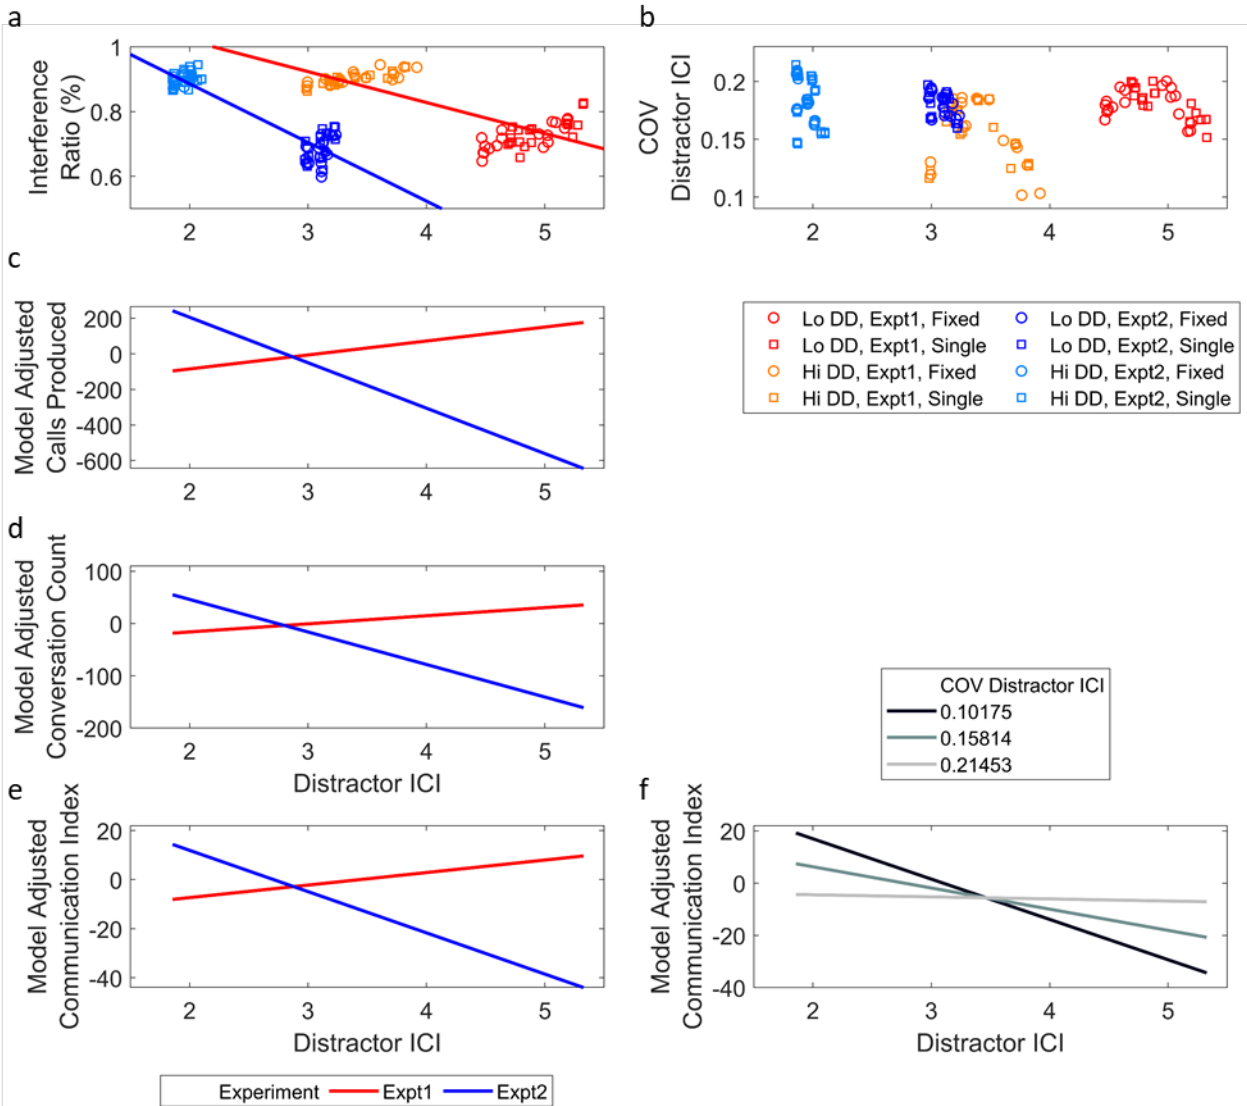

1013  
 1014 **Figure 6.** Linear Model Outcome (a) Scatter plot displaying Interference Ratio for the Distractor  
 1015 ICI measured during in each test session. Lines represent the least-squares fit for each  
 1016 Experiment. (b) Plots the COV Distractor ICI for the Distractor ICI measured during in each test  
 1017 session. Figure legend for (a & b) is shown below (b). (c-e) Significant interactive effects of  
 1018 Distractor ICI with different metrics of vocal behavior revealed by the linear model are shown.  
 1019 Results of the model from Experiment 1: 2-pulse VM phee calls (red line) and Experiment 2: 1-  
 1020 pulse VM phee calls are shown (blue line). The adjusted response value accounts for the average  
 1021 values of all other terms except Distractor ICI x Experiment within the linear model. (c) Plots  
 1022 Distractor ICI cross Experiment type by the adjusted response variable of Calls Produced by the  
 1023 subject in each session. (d) Plots Distractor ICI cross Experiment type by the adjusted response  
 1024 variable of Conversation Count. Conversation Count refers to number of conversations with at  
 1025 least two or more subject responses made in a session. (e) Plots the relationship between model  
 1026 adjusted median Communication Index of the subject for Target VM by the Distractor ICI. (f)  
 1027 Distractor ICI x COV Distractor ICI term (which represents the standard deviation of Distractor  
 1028 ICI) is plotted against its effect on the Conversation Index. COV values plotted include minimum  
 1029 (light grey), maximum (dark grey), and the average of the two (mid-grey).
